# Supplementary material for: Antibiotic Resistance and Phylogeny of Pseudomonas spp. Isolated over Three Decades from Chicken Meat in the Norwegian Food Chain
Source: PubMed Central journal article supplement (PMC7909287; doi:10.3390/microorganisms9020207), 2021-01-20
Supplement: microorganisms-09-00207-s001.pdf [file microorganisms-09-00207-s001.pdf]

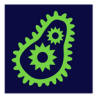

# Supplementary Materials: Antibiotic Resistance and Phylogeny of *Pseudomonas* spp. Isolated over Three Decades from Chicken Meat in the Norwegian Food Chain

Even Heir \*, Birgitte Moen, Anette Wold Åsli, Marianne Sunde and Solveig Langsrud

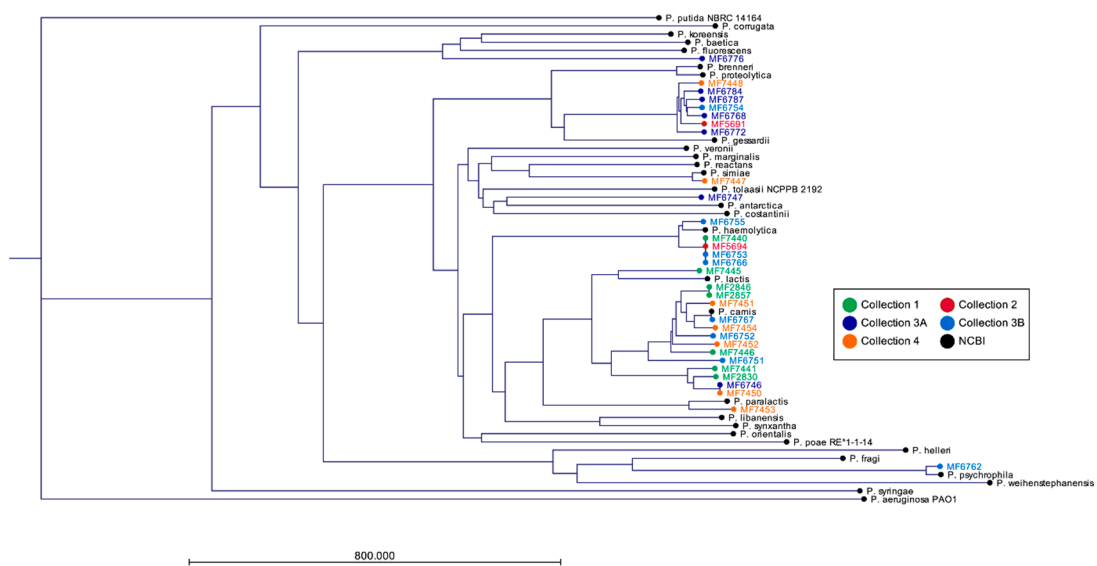

**Figure S1.** NDtree of the genome sequenced isolates (n = 31) together with 29 selected representative isolates from NCBI. The NCBI isolates are shown by species name in black and the 31 isolates from this study are colored according to collection number.

**Citation:** Heir, E.; Moen, B.; Åsli, A.W.; Sunde, M.; Langsrud, S. Antibiotic resistance and phylogeny of *Pseudomonas* spp. isolated over three decades from chicken meat in the Norwegian food chain *Microorganisms* **2021**, *9*, 207. <https://doi.org/10.3390/microorganisms9020207>

Received: 20 December 2020  
Accepted: 18 January 2021  
Published: 20 January 2021

**Publisher’s Note:** MDPI stays neutral with regard to jurisdictional claims in published maps and institutional affiliations.

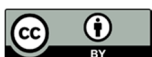

**Copyright:** © 2021 by the authors. Submitted for possible open access publication under the terms and conditions of the Creative Commons Attribution (CC BY) license (<http://creativecommons.org/licenses/by/4.0/>).

**Table S1.** Information and statistics on draft genome assembly data for 31 *Pseudomonas* spp. strains.

| Assembl<br>y | # contigs<br>(≥ 500<br>bp) | Total<br>length<br>(≥500 bp) | Largest<br>contig | GC (%) | N50    | CDS<br>(prokka) | rRNA | Repeat<br>region | Run No | Average<br>coverage | Collectio<br>n no. |
|--------------|----------------------------|------------------------------|-------------------|--------|--------|-----------------|------|------------------|--------|---------------------|--------------------|
| MF2830       | 66                         | 5974525                      | 756123            | 60.21  | 225689 | 5430            | 4    |                  | 2      | 90                  | 1                  |
| MF2846       | 49                         | 6201956                      | 940246            | 60.14  | 243731 | 5580            | 6    |                  | 2      | 82                  | 1                  |
| MF2857       | 46                         | 6201932                      | 606173            | 60.14  | 333850 | 5581            | 6    |                  | 2      | 87                  | 1                  |
| MF5691       | 63                         | 6222407                      | 578174            | 60.42  | 240657 | 5598            | 6    |                  | 1      | 356                 | 2                  |
| MF5694       | 28                         | 6042078                      | 1062146           | 59.98  | 599652 | 5334            | 5    |                  | 2      | 98                  | 2                  |
| MF6746       | 98                         | 6555296                      | 410551            | 59.74  | 167740 | 5943            | 6    |                  | 2      | 80                  | 3A                 |
| MF6747       | 51                         | 6811860                      | 517135            | 60.05  | 297540 | 6156            | 6    |                  | 2      | 74                  | 3A                 |
| MF6751       | 105                        | 6163290                      | 397146            | 60.05  | 141886 | 5508            | 8    |                  | 1      | 324                 | 3B                 |
| MF6752       | 52                         | 6100883                      | 955559            | 60.09  | 322679 | 5450            | 8    |                  | 2      | 95                  | 3B                 |
| MF6753       | 36                         | 6207278                      | 1159705           | 59.64  | 367283 | 5536            | 6    |                  | 2      | 102                 | 3B                 |
| MF6754       | 76                         | 6264719                      | 612375            | 60.29  | 249574 | 5613            | 7    |                  | 2      | 108                 | 3B                 |
| MF6755       | 59                         | 6561166                      | 494347            | 59.49  | 265651 | 5849            | 5    |                  | 1      | 282                 | 3B                 |
| MF6762       | 77                         | 5804763                      | 410820            | 57.3   | 190055 | 5389            | 5    |                  | 2      | 114                 | 3B                 |
| MF6766       | 27                         | 6379767                      | 1749566           | 59.63  | 696963 | 5710            | 5    |                  | 1      | 347                 | 3B                 |
| MF6767       | 63                         | 6547104                      | 745903            | 59.74  | 256027 | 5937            | 7    |                  | 2      | 77                  | 3B                 |
| MF6768       | 95                         | 6012416                      | 426850            | 60.6   | 161035 | 5420            | 6    |                  | 2      | 101                 | 3A                 |
| MF6772       | 65                         | 6218191                      | 525726            | 60.69  | 237631 | 5643            | 6    |                  | 2      | 96                  | 3A                 |
| MF6776       | 117                        | 6666116                      | 466001            | 58.51  | 211334 | 6068            | 4    |                  | 1      | 328                 | 3A                 |
| MF6784       | 67                         | 5970081                      | 629089            | 60.67  | 266923 | 5370            | 8    |                  | 2      | 96                  | 3A                 |
| MF6787       | 62                         | 6300351                      | 1029761           | 60.28  | 237634 | 5682            | 7    |                  | 1      | 230                 | 3A                 |
| MF7440       | 36                         | 6282835                      | 829529            | 59.78  | 487444 | 5585            | 5    |                  | 3      | 41                  | 1                  |
| MF7441       | 68                         | 6070436                      | 627072            | 60.05  | 186108 | 5510            | 6    |                  | 3      | 52                  | 1                  |
| MF7445       | 101                        | 6782664                      | 572539            | 59.78  | 163205 | 6100            | 6    |                  | 3      | 46                  | 1                  |
| MF7446       | 44                         | 6162814                      | 738133            | 59.95  | 279499 | 5489            | 7    |                  | 3      | 38                  | 1                  |
| MF7447       | 55                         | 6448003                      | 748871            | 60.25  | 274573 | 5854            | 7    |                  | 3      | 46                  | 4                  |
| MF7448       | 84                         | 6093941                      | 796909            | 60.71  | 163092 | 5506            | 8    |                  | 3      | 42                  | 4                  |
| MF7450       | 131                        | 6447082                      | 337237            | 59.74  | 113604 | 5803            | 5    |                  | 3      | 48                  | 4                  |
| MF7451       | 53                         | 6259359                      | 467413            | 59.91  | 259080 | 5604            | 8    |                  | 3      | 76                  | 4                  |
| MF7452       | 73                         | 6430424                      | 452601            | 59.61  | 191638 | 5815            | 8    |                  | 3      | 53                  | 4                  |
| MF7453       | 55                         | 6529967                      | 767135            | 59.63  | 291860 | 5822            | 5    | 1                | 3      | 97                  | 4                  |
| MF7454       | 78                         | 6809055                      | 555633            | 59.43  | 196228 | 6253            | 7    |                  | 3      | 57                  | 4                  |

**Table S2.** List of 28 *Pseudomonas* genome assemblies downloaded from the NCBI microbial genome database and used in the NDtree analyses.

| Assembly ID     | Origin | Organism Name                 | Strain        | Level      |
|-----------------|--------|-------------------------------|---------------|------------|
| GCA_900113625.1 | NCBI   | <i>P. syringae</i>            | BS3827        | Contig     |
| GCA_900105935.1 | NCBI   | <i>P. costantinii</i>         | BS2773        | Contig     |
| GCA_900101415.1 | NCBI   | <i>P. koreensis</i>           | BS3658        | Chromosome |
| GCA_900101185.1 | NCBI   | <i>P. gessardii</i>           | BS2982        | Contig     |
| GCA_013522805.1 | NCBI   | <i>P. carnis</i>              | 96A1          | Contig     |
| GCA_013385825.1 | NCBI   | <i>P. reactans</i>            | C5002         | Scaffold   |
| GCA_012986545.1 | NCBI   | <i>P. lactis</i>              | WS 5000       | Contig     |
| GCA_012986025.1 | NCBI   | <i>P. proteolytica</i>        | WS 5126       | Contig     |
| GCA_011040435.1 | NCBI   | <i>P. psychrophila</i>        | KM02          | Complete   |
| GCA_010448615.1 | NCBI   | <i>P. fluorescens</i>         | DR397         | Complete   |
| GCA_009659615.1 | NCBI   | <i>P. haemolytica</i>         | DSM<br>108988 | Contig     |
| GCA_004363635.1 | NCBI   | <i>P. brenneri</i>            | BIGb0273      | Scaffold   |
| GCA_003851495.1 | NCBI   | <i>P. synxantha</i>           | feb.79        | Complete   |
| GCA_002934065.1 | NCBI   | <i>P. orientalis</i>          | F9            | Complete   |
| GCA_002813455.1 | NCBI   | <i>P. baetica</i>             | LMG<br>25716  | Contig     |
| GCA_002813445.1 | NCBI   | <i>P. tolaasii</i> NCPPB 2192 | NCPPB<br>2192 | Contig     |
| GCA_002269585.1 | NCBI   | <i>P. fragi</i>               | F1786         | Scaffold   |
| GCA_002028325.1 | NCBI   | <i>P. veronii</i>             | R02           | Complete   |
| GCA_001708425.1 | NCBI   | <i>P. corrugata</i>           | RM1-1-4       | Complete   |
| GCA_001647715.1 | NCBI   | <i>P. antarctica</i>          | PAMC<br>27494 | Complete   |
| GCA_001439735.1 | NCBI   | <i>P. paralactis</i>          | DSM<br>29164  | Contig     |
| GCA_001439685.1 | NCBI   | <i>P. libanensis</i>          | DSM<br>17149  | Contig     |
| GCA_001043065.1 | NCBI   | <i>P. helleri</i>             | DSM<br>28141  | Contig     |
| GCA_001043055.1 | NCBI   | <i>P. weihenstephanensis</i>  | DSM<br>29166  | Contig     |
| GCA_000967935.1 | NCBI   | <i>P. marginalis</i>          | H21           | Scaffold   |
| GCA_000934565.1 | NCBI   | <i>P. simiae</i>              | PCL1751       | Complete   |

|                 |      |                             |               |          |
|-----------------|------|-----------------------------|---------------|----------|
| GCA_000412675.1 | NCBI | <i>P. putida</i> NBRC 14164 | NBRC<br>14164 | Complete |
| GCA_000336465.1 | NCBI | <i>P. poae</i> RE*1-1-14    | RE*1-1-<br>14 | Complete |
| GCA_000006765.1 | NCBI | <i>P. aeruginosa</i> PAO1   | PAO1          | Complete |

**Table S3.** Species prevalence within the *Pseudomonas* strain collections 1, 2, 3A, 3B and 4. Best match species (partial 16S rRNA gene), number of isolates within that species (n) and corresponding prevalence (%) within the different collections (1, 2, 3A, 3B and 4) are shown.

| Best match (species) <sup>1</sup>     | 1 | 2   | 3A  | 3B  | 4   | Grand total |     |
|---------------------------------------|---|-----|-----|-----|-----|-------------|-----|
| <i>P. gessardii</i> (n = 68)          |   | 4%  | 9%  | 42% | 11% | 22%         | 21% |
| <i>P. lactis</i> (n = 57)             |   | 19% | 9%  | 10% | 39% | 24%         | 18% |
| <i>P. weihenstephanensis</i> (n = 52) |   | 35% | 21% | 8%  | 6%  | 0%          | 16% |
| <i>P. canadensis</i> (n = 22)         |   | 3%  | 3%  | 4%  | 33% | 4%          | 7%  |
| <i>P. veronii</i> (n = 22)            |   | 1%  | 9%  | 16% | 0%  | 0%          | 7%  |
| <i>P. cerasi</i> (n = 16)             |   | 7%  | 12% | 4%  | 3%  | 0%          | 5%  |
| <i>P. corrugata</i> (n = 13)          |   | 1%  | 9%  | 4%  | 3%  | 9%          | 4%  |
| <i>P. fragi</i> (n = 13)              |   | 4%  | 6%  | 6%  | 0%  | 0%          | 4%  |
| <i>P. marginalis</i> (n = 11)         |   | 4%  | 3%  | 1%  | 3%  | 9%          | 3%  |
| <i>P. migulae</i> (n = 11)            |   | 2%  | 6%  | 5%  | 0%  | 2%          | 3%  |
| <i>P. helleri</i> (n = 7)             |   | 6%  | 0%  | 0%  | 0%  | 0%          | 2%  |
| <i>P. koreensis</i> (n = 6)           |   | 5%  | 3%  | 0%  | 0%  | 2%          | 2%  |
| <i>P. tolaasii</i> (n = 6)            |   | 4%  | 3%  | 0%  | 3%  | 0%          | 2%  |
| <i>P. silesiensis</i> (n = 5)         |   | 0%  | 0%  | 0%  | 0%  | 11%         | 2%  |
| <i>P. helmanticensis</i> (n = 4)      |   | 2%  | 3%  | 0%  | 0%  | 2%          | 1%  |
| <i>P. turukhanskensis</i> (n = 3)     |   | 1%  | 0%  | 0%  | 0%  | 4%          | 1%  |
| <i>P. deceptionensis</i> (n = 2)      |   | 0%  | 3%  | 1%  | 0%  | 0%          | 1%  |
| <i>P. flavescens</i> (n = 2)          |   | 0%  | 0%  | 0%  | 0%  | 4%          | 1%  |
| <i>P. brassicacearum</i> (n = 1)      |   | 0%  | 0%  | 0%  | 0%  | 2%          | 0%  |
| <i>P. brenneri</i> (n = 1)            |   | 0%  | 0%  | 1%  | 0%  | 0%          | 0%  |
| <i>P. caeni</i> (n = 1)               |   | 0%  | 0%  | 0%  | 0%  | 2%          | 0%  |
| <i>P. rhodesiae</i> (n = 1)           |   | 1%  | 0%  | 0%  | 0%  | 0%          | 0%  |
| <i>P. versuta</i> (n = 1)             |   | 0%  | 3%  | 0%  | 0%  | 0%          | 0%  |

<sup>1</sup> Best match based on 288 bp of the 16S rRNA gene and the BLAST 16S rRNA (bacterial and archaea type strains) database.

**Table S4.** Taxonomy of isolates in Collection 1. The taxonomy based on carbon assimilation (Sundheim et al. 1998) and best BLAST match of partial 16S rRNA gene (288bp) are given for all isolates. The corresponding rMLST and nearest neighbour (NDtree) are given for the 7 isolates that were genome sequenced from Collection 1. Two isolates did not have a MF-number and are represented as na.

| Strain | Carbon profile | Grouping according to | BLAST 16S best match | rMLST | Ndtree cluster |
|--------|----------------|-----------------------|----------------------|-------|----------------|
|--------|----------------|-----------------------|----------------------|-------|----------------|

| <b>Sundheim et al.<br/>(1998)</b> |   |                                                         |                      |                       |                                        |
|-----------------------------------|---|---------------------------------------------------------|----------------------|-----------------------|----------------------------------------|
| MF2846                            | A | <i>P. fluorescens</i> biovar I-1                        | <i>P. lactis</i>     | <i>Pseudomonas</i>    | <i>P. lactis</i> /<br><i>P. carnis</i> |
| MF7439                            | A | <i>P. fluorescens</i> biovar I-1                        | <i>P. lactis</i>     |                       |                                        |
| MF7441                            | A | <i>P. fluorescens</i> biovar I-1                        | <i>P. lactis</i>     | <i>P. fluorescens</i> | <i>P. lactis</i> /<br><i>P. carnis</i> |
| MF2857                            | A | <i>P. fluorescens</i> biovar I-1                        | <i>P. lactis</i>     | <i>Pseudomonas</i>    | <i>P. lactis</i> /<br><i>P. carnis</i> |
| MF7442                            | A | <i>P. fluorescens</i> biovar I-1                        | <i>P. lactis</i>     |                       |                                        |
| MF2828                            | A | <i>P. fluorescens</i> biovar I-1                        | <i>P. lactis</i>     |                       |                                        |
| MF2830                            | A | <i>P. fluorescens</i> biovar I-1                        | <i>P. lactis</i>     | <i>P. fluorescens</i> | <i>P. lactis</i> /<br><i>P. carnis</i> |
| na                                | A | <i>P. fluorescens</i> biovar I-1                        | <i>P. lactis</i>     |                       |                                        |
| MF7445                            | A | <i>P. fluorescens</i> biovar I-1                        | <i>P. lactis</i>     | <i>P. lactis</i>      | <i>P. lactis</i> /<br><i>P. carnis</i> |
| MF2815                            | A | <i>P. fluorescens</i> biovar I-1                        | <i>P. lactis</i>     |                       |                                        |
| MF7547                            | A | <i>P. fluorescens</i> biovar I-1                        | <i>P. lactis</i>     |                       |                                        |
| MF7446                            | A | <i>P. fluorescens</i> biovar I-1                        | <i>P. lactis</i>     | <i>P. carnis</i>      | <i>P. lactis</i> /<br><i>P. carnis</i> |
| MF7553                            | A | <i>P. fluorescens</i> biovar I-1                        | <i>P. lactis</i>     |                       |                                        |
| MF7490                            | B | very similar assimilation properties to group A strains | <i>P. canadensis</i> |                       |                                        |
| MF7440                            | B | very similar assimilation properties to group A strains | <i>P. canadensis</i> | <i>P. haemolytica</i> | <i>P. haemolytica</i>                  |
| MF7521                            | B | very similar assimilation properties to group A strains | <i>P. canadensis</i> |                       |                                        |
| MF7537                            | B | very similar assimilation properties to group A strains | <i>P. gessardii</i>  |                       |                                        |
| MF7443                            | B | very similar assimilation properties to group A strains | <i>P. lactis</i>     |                       |                                        |
| na                                | B | very similar assimilation                               | <i>P. lactis</i>     |                       |                                        |

|        |   |                                                                  |                                        |
|--------|---|------------------------------------------------------------------|----------------------------------------|
|        |   | properties to group<br>A strains                                 |                                        |
| MF7444 | B | very similar<br>assimilation<br>properties to group<br>A strains | <i>P. lactis</i>                       |
| MF7546 | B | very similar<br>assimilation<br>properties to group<br>A strains | <i>P. lactis</i>                       |
| MF7477 | C | <i>P. lundensis</i>                                              | <i>P.</i><br><i>weihenstephanensis</i> |
| MF7484 | C | <i>P. lundensis</i>                                              | <i>P.</i><br><i>weihenstephanensis</i> |
| MF7486 | C | <i>P. lundensis</i>                                              | <i>P.</i><br><i>weihenstephanensis</i> |
| MF7500 | C | <i>P. lundensis</i>                                              | <i>P.</i><br><i>weihenstephanensis</i> |
| MF7510 | C | <i>P. lundensis</i>                                              | <i>P.</i><br><i>weihenstephanensis</i> |
| MF7512 | C | <i>P. lundensis</i>                                              | <i>P.</i><br><i>weihenstephanensis</i> |
| MF7513 | C | <i>P. lundensis</i>                                              | <i>P.</i><br><i>weihenstephanensis</i> |
| MF7523 | C | <i>P. lundensis</i>                                              | <i>P.</i><br><i>weihenstephanensis</i> |
| MF7531 | C | <i>P. lundensis</i>                                              | <i>P.</i><br><i>weihenstephanensis</i> |
| MF7543 | C | <i>P. lundensis</i>                                              | <i>P.</i><br><i>weihenstephanensis</i> |
| MF7550 | C | <i>P. lundensis</i>                                              | <i>P.</i><br><i>weihenstephanensis</i> |
| MF7551 | C | <i>P. lundensis</i>                                              | <i>P.</i><br><i>weihenstephanensis</i> |
| MF7552 | C | <i>P. lundensis</i>                                              | <i>P.</i><br><i>weihenstephanensis</i> |
| MF7519 | D | Similar to group C                                               | <i>P. koreensis</i>                    |
| MF7475 | D | Similar to group C                                               | <i>P.</i><br><i>weihenstephanensis</i> |
| MF7476 | D | Similar to group C                                               | <i>P.</i><br><i>weihenstephanensis</i> |
| MF7479 | D | Similar to group C                                               | <i>P.</i><br><i>weihenstephanensis</i> |
| MF7481 | D | Similar to group C                                               | <i>P.</i><br><i>weihenstephanensis</i> |
| MF7485 | D | Similar to group C                                               | <i>P.</i><br><i>weihenstephanensis</i> |
| MF7497 | D | Similar to group C                                               | <i>P.</i><br><i>weihenstephanensis</i> |
| MF7502 | D | Similar to group C                                               | <i>P.</i><br><i>weihenstephanensis</i> |

|        |    |                                            |                              |
|--------|----|--------------------------------------------|------------------------------|
| MF7506 | D  | Similar to group C                         | <i>P. weihenstephanensis</i> |
| MF7511 | D  | Similar to group C                         | <i>P. weihenstephanensis</i> |
| MF7504 | D  | Similar to group C                         | <i>P. weihenstephanensis</i> |
| MF7518 | D  | Similar to group C                         | <i>P. weihenstephanensis</i> |
| MF7527 | D  | Similar to group C                         | <i>P. weihenstephanensis</i> |
| MF7533 | D  | Similar to group C                         | <i>P. weihenstephanensis</i> |
| MF7549 | D  | Similar to group C                         | <i>P. weihenstephanensis</i> |
| MF7496 | E1 | <i>P. fluorescens</i> biovars IV-1 and V-1 | <i>P. corrugata</i>          |
| MF7501 | E1 | <i>P. fluorescens</i> biovars IV-1 and V-1 | <i>P. migulae</i>            |
| MF7503 | E1 | <i>P. fluorescens</i> biovars IV-1 and V-1 | <i>P. turukhanskensis</i>    |
| MF7555 | E1 | <i>P. fluorescens</i> biovars IV-1 and V-1 | <i>P. weihenstephanensis</i> |
| MF7494 | E2 | E strains fell in between E1 og F          | <i>P. helmanticensis</i>     |
| MF7493 | E2 | E strains fell in between E1 og F          | <i>P. koreensis</i>          |
| MF7499 | E2 | E strains fell in between E1 og F          | <i>P. koreensis</i>          |
| MF7517 | E2 | E strains fell in between E1 og F          | <i>P. koreensis</i>          |
| MF7492 | F  | <i>P. fluorescens</i> biovar V-2           | <i>P. helmanticensis</i>     |
| MF7491 | F  | <i>P. fluorescens</i> biovar V-2           | <i>P. koreensis</i>          |
| MF2331 | G  | <i>P. fragi</i>                            | <i>P. cerasi</i>             |
| MF7539 | G  | <i>P. fragi</i>                            | <i>P. cerasi</i>             |
| MF7532 | G  | <i>P. fragi</i>                            | <i>P. fragi</i>              |
| MF7480 | G  | <i>P. fragi</i>                            | <i>P. marginalis</i>         |
| MF7509 | H  | Similar to group G                         | <i>P. cerasi</i>             |
| MF7514 | H  | Similar to group G                         | <i>P. cerasi</i>             |
| MF7534 | H  | Similar to group G                         | <i>P. cerasi</i>             |
| MF7529 | H  | Similar to group G                         | <i>P. cerasi</i>             |
| MF7530 | H  | Similar to group G                         | <i>P. cerasi</i>             |
| MF7542 | H  | Similar to group G                         | <i>P. fragi</i>              |
| MF7538 | H  | Similar to group G                         | <i>P. fragi</i>              |
| MF7548 | H  | Similar to group G                         | <i>P. fragi</i>              |

|        |   |                                                              |                              |
|--------|---|--------------------------------------------------------------|------------------------------|
| MF7528 | H | Similar to group G                                           | <i>P. weihenstephanensis</i> |
| MF7482 | I | closest similarity was with <i>P. fluorescens</i> biovar V-4 | <i>P. helleri</i>            |
| MF7526 | I | closest similarity was with <i>P. fluorescens</i> biovar V-4 | <i>P. helleri</i>            |
| MF7535 | I | closest similarity was with <i>P. fluorescens</i> biovar V-4 | <i>P. helleri</i>            |
| MF7541 | I | closest similarity was with <i>P. fluorescens</i> biovar V-4 | <i>P. helleri</i>            |
| MF7554 | I | closest similarity was with <i>P. fluorescens</i> biovar V-4 | <i>P. helleri</i>            |
| MF7558 | I | closest similarity was with <i>P. fluorescens</i> biovar V-4 | <i>P. helleri</i>            |
| MF7524 | J | <i>P. fluorescens</i> biovar II strains and biovar II-3      | <i>P. marginalis</i>         |
| MF2868 | J | <i>P. fluorescens</i> biovar II strains and biovar II-3      | <i>P. marginalis</i>         |
| MF7544 | J | <i>P. fluorescens</i> biovar II strains and biovar II-3      | <i>P. rhodesiae</i>          |
| MF7536 | J | <i>P. fluorescens</i> biovar II strains and biovar II-3      | <i>P. weihenstephanensis</i> |
| MF7438 | K | <i>P. fluorescens</i> biovar II-1                            | <i>P. lactis</i>             |
| MF7520 | K | <i>P. fluorescens</i> biovar II-1                            | <i>P. marginalis</i>         |
| MF7474 | K | <i>P. fluorescens</i> biovar II-1                            | <i>P. tolaasii</i>           |
| MF7483 | K | <i>P. fluorescens</i> biovar II-1                            | <i>P. tolaasii</i>           |
| MF7489 | K | <i>P. fluorescens</i> biovar II-1                            | <i>P. tolaasii</i>           |
| MF7498 | K | <i>P. fluorescens</i> biovar II-1                            | <i>P. tolaasii</i>           |
| MF7540 | M | <i>P. fluorescens</i> biovar III-1                           | <i>P. gessardii</i>          |



|        |   |                                    |                              |
|--------|---|------------------------------------|------------------------------|
| MF7556 | M | <i>P. fluorescens</i> biovar III-1 | <i>P. gessardii</i>          |
| MF7495 | M | <i>P. fluorescens</i> biovar III-1 | <i>P. veronii</i>            |
| MF7516 | N | not assigned                       | <i>P. gessardii</i>          |
| MF7478 | O | not assigned                       | <i>P. migulae</i>            |
| MF7508 | O | not assigned                       | <i>P. weihenstephanensis</i> |
| MF7487 | P | not assigned                       | <i>P. weihenstephanensis</i> |
| MF7515 | P | not assigned                       | <i>P. weihenstephanensis</i> |
| MF7545 | P | not assigned                       | <i>P. weihenstephanensis</i> |

Table S5. Antibiotic susceptibility data and presence/absence of class 1 integrons in 175 *Pseudomonas* spp. isolates.

| Isolate number | Identification (BLAST 16S rDNA) | Isolate collection | <i>int1</i> (class 1 integron) | Antibiotics and MIC-values (mg/L) |          |            |           |               |                         |                        |          |            |             |                      |          |
|----------------|---------------------------------|--------------------|--------------------------------|-----------------------------------|----------|------------|-----------|---------------|-------------------------|------------------------|----------|------------|-------------|----------------------|----------|
|                |                                 |                    |                                | Meropenem                         | Amikacin | Gentamicin | Aztreonam | Ciprofloxacin | Piperacillin/Tazobactam | Ceftolozane/Tazobactam | Colistin | Tobramycin | Ceftazidime | Ceftazidime/vibactam | Imipenem |
| 2331           | <i>P. cerasi</i>                | 1                  | Neg                            | ≤ 0.12                            | ≤ 4      | ≤ 0.5      | 8         | ≤ 0.06        | 2/4                     | 2/4                    | 4        | ≤ 1        | 2           | 2/4                  | 2        |
| 2830           | <i>P. lactis</i>                | 1                  | Neg                            | 16                                | ≤ 4      | ≤ 0.5      | 64        | ≤ 0.06        | 4/4                     | 1/4                    | ≥ 16     | 2          | 2           | 2/4                  | 16       |
| 2846           | <i>P. lactis</i>                | 1                  | Neg                            | 8                                 | ≤ 4      | ≤ 0.5      | 64        | 0.12          | 2/4                     | 1/4                    | ≥ 16     | 2          | 2           | 2/4                  | 16       |
| 2857           | <i>P. lactis</i>                | 1                  | Neg                            | 8                                 | ≤ 4      | ≤ 0.5      | 64        | 0.12          | 4/4                     | 1/4                    | ≥ 16     | 2          | 2           | 2/4                  | 16       |
| 2868           | <i>P. marginalis</i>            | 1                  | Neg                            | 8                                 | ≤ 4      | ≤ 0.5      | 64        | 0.25          | 8/4                     | 2/4                    | 8        | ≤ 1        | 8           | 8/4                  | 4        |
| 5677           | <i>P. migulae</i>               | 2                  | Neg                            | 0.5                               | ≤ 4      | ≤ 0.5      | 64        | 0.12          | 4/4                     | ≤ 0.5/4                | 0.5      | 2          | 4           | 4/4                  | ≤ 0.5    |
| 5678           | <i>P. marginalis</i>            | 2                  | Neg                            | 2                                 | ≤ 4      | ≤ 0.5      | 64        | ≤ 0.06        | 8/4                     | 2/4                    | 4        | 2          | 4           | 4/4                  | 2        |
| 5680           | <i>P. veronii</i>               | 2                  | Neg                            | 2                                 | ≤ 4      | ≤ 0.5      | 64        | ≤ 0.06        | 16/4                    | 2/4                    | ≤ 0.25   | 2          | 8           | 4/4                  | 1        |
| 5687           | <i>P. tolaasii</i>              | 2                  | Neg                            | 4                                 | ≤ 4      | ≤ 0.5      | 64        | ≤ 0.06        | 4/4                     | 1/4                    | 1        | 2          | 4           | 2/4                  | 8        |
| 5688           | <i>P. migulae</i>               | 2                  | Neg                            | 0.5                               | ≤ 4      | ≤ 0.5      | 32        | ≤ 0.06        | 8/4                     | ≤ 0.5/4                | 1        | 2          | 2           | 2/4                  | 1        |
| 5691           | <i>P. gessardii</i>             | 2                  | Neg                            | 32                                | ≤ 4      | ≤ 0.5      | 32        | ≤ 0.06        | 8/4                     | 1/4                    | 1        | 2          | 16          | 4/4                  | 16       |
| 5692           | <i>P. veronii</i>               | 2                  | Neg                            | 1                                 | ≤ 4      | ≤ 0.5      | 64        | ≤ 0.06        | 4/4                     | 1/4                    | 8        | 2          | 2           | 2/4                  | 2        |
| 5694           | <i>P. canadensis</i>            | 2                  | Neg                            | 16                                | ≤ 4      | ≤ 0.5      | 64        | 0.25          | 8/4                     | 1/4                    | ≥ 16     | 2          | 4           | 4/4                  | 16       |

|      |                              |    |     |        |     |       |    |        |       |         |      |   |       |         |       |
|------|------------------------------|----|-----|--------|-----|-------|----|--------|-------|---------|------|---|-------|---------|-------|
| 5696 | <i>P. gessardii</i>          | 2  | Neg | 4      | ≤ 4 | ≤ 0.5 | 64 | ≤ 0.06 | 8/4   | 1/4     | 1    | 2 | 8     | 2/4     | 4     |
| 5697 | <i>P. weihenstephanensis</i> | 2  | Neg | 4      | ≤ 4 | ≤ 0.5 | 64 | 0.12   | 4/4   | 1/4     | 2    | 2 | 2     | 2/4     | 2     |
| 5701 | <i>P. decepti onensis</i>    | 2  | Neg | ≤ 0.12 | ≤ 4 | ≤ 0.5 | 8  | ≤ 0.06 | 2/4   | 1/4     | 1    | 2 | 1     | 1/4     | 1     |
| 5702 | <i>P. fragi</i>              | 2  | Neg | ≤ 0.12 | ≤ 4 | ≤ 0.5 | 16 | ≤ 0.06 | 4/4   | 2/4     | 1    | 2 | 4     | 4/4     | ≤ 0.5 |
| 5703 | <i>P. corrugata</i>          | 2  | Neg | 0.25   | ≤ 4 | ≤ 0.5 | 32 | ≤ 0.06 | 8/4   | ≤ 0.5/4 | 0.5  | 2 | 4     | 4/4     | ≤ 0.5 |
| 5706 | <i>P. cerasi</i>             | 2  | Neg | ≤ 0.12 | ≤ 4 | ≤ 0.5 | 16 | ≤ 0.06 | 4/4   | 2/4     | 4    | 2 | 4     | 4/4     | 2     |
| 5707 | <i>P. helman ticensis</i>    | 2  | Neg | 0.5    | ≤ 4 | ≤ 0.5 | 32 | 0.12   | 8/4   | ≤ 0.5/4 | 1    | 2 | 2     | 2/4     | 1     |
| 5708 | <i>P. koreensis</i>          | 2  | Neg | 0.25   | ≤ 4 | ≤ 0.5 | 64 | ≤ 0.06 | 16/4  | 1/4     | 1    | 2 | ≥ 32  | 4/4     | 2     |
| 5724 | <i>P. lactis</i>             | 2  | Neg | 8      | ≤ 4 | ≤ 0.5 | 64 | ≤ 0.06 | 8/4   | 1/4     | ≥ 16 | 2 | 2     | 2/4     | 8     |
| 5729 | <i>P. versuta</i>            | 2  | Neg | ≤ 0.12 | ≤ 4 | ≤ 0.5 | 1  | ≤ 0.06 | ≤ 1/4 | ≤ 0.5/4 | 8    | 2 | ≤ 0.5 | ≤ 0.5/4 | ≤ 0.5 |
| 5731 | <i>P. weihenstephanensis</i> | 2  | Neg | ≤ 0.12 | ≤ 4 | ≤ 0.5 | 8  | 0.12   | 4/4   | 1/4     | 1    | 2 | 1     | 1/4     | 1     |
| 6729 | <i>P. corrugata</i>          | 3A | Neg | 1      | ≤ 4 | ≤ 0.5 | 32 | 0.12   | 4/4   | ≤ 0.5/4 | 0.5  | 2 | 4     | 2/4     | 1     |
| 6730 | <i>P. gessardii</i>          | 3A | Neg | 8      | ≤ 4 | ≤ 0.5 | 64 | ≤ 0.06 | 8/4   | 1/4     | 0.5  | 2 | 8     | 4/4     | 4     |
| 6731 | <i>P. lactis</i>             | 3A | Neg | 2      | ≤ 4 | ≤ 0.5 | 64 | ≤ 0.06 | 2/4   | ≤ 0.5/4 | ≥ 16 | 2 | 2     | 1/4     | 2     |
| 6732 | <i>P. cerasi</i>             | 3A | Neg | ≤ 0.12 | ≤ 4 | ≤ 0.5 | 8  | ≤ 0.06 | 2/4   | 2/4     | 1    | 2 | 2     | 2/4     | ≤ 0.5 |
| 6734 | <i>P. gessardii</i>          | 3A | Neg | 4      | ≤ 4 | ≤ 0.5 | 64 | ≤ 0.06 | 8/4   | 2/4     | 1    | 2 | 4     | 4/4     | 2     |
| 6735 | <i>P. weihenstephanensis</i> | 3A | Neg | ≤ 0.12 | ≤ 4 | ≤ 0.5 | 8  | 0.12   | 2/4   | 1/4     | 1    | 2 | 1     | 1/4     | ≤ 0.5 |
| 6736 | <i>P. corrugata</i>          | 3A | Neg | ≤ 0.12 | ≤ 4 | ≤ 0.5 | 32 | ≤ 0.06 | 4/4   | ≤ 0.5/4 | 1    | 2 | 2     | 2/4     | ≤ 0.5 |
| 6737 | <i>P. weihenstephanensis</i> | 3A | Neg | ≤ 0.12 | ≤ 4 | ≤ 0.5 | 8  | ≤ 0.06 | 2/4   | 2/4     | 0.5  | 2 | 2     | 2/4     | 1     |
| 6738 | <i>P. fragi</i>              | 3A | Neg | ≤ 0.12 | ≤ 4 | ≤ 0.5 | 8  | ≤ 0.06 | 4/4   | 1/4     | 2    | 2 | 2     | 2/4     | ≤ 0.5 |
| 6739 | <i>P. gessardii</i>          | 3A | Neg | 16     | ≤ 4 | ≤ 0.5 | 64 | ≤ 0.06 | 8/4   | 1/4     | 1    | 2 | 8     | 2/4     | 8     |

|      |                            |    |     |        |     |       |    |        |      |         |      |     |    |     |       |
|------|----------------------------|----|-----|--------|-----|-------|----|--------|------|---------|------|-----|----|-----|-------|
| 6740 | <i>P. canadensis</i>       | 3A | Neg | 8      | ≤ 4 | ≤ 0.5 | 64 | 0.25   | 8/4  | 1/4     | ≥ 16 | 2   | 4  | 4/4 | 8     |
| 6741 | <i>P. veronii</i>          | 3A | Neg | 2      | ≤ 4 | ≤ 0.5 | 64 | 0.12   | 8/4  | 2/4     | 0.5  | 2   | 8  | 4/4 | 2     |
| 6742 | <i>P. weihenstephensis</i> | 3A | Neg | ≤ 0.12 | ≤ 4 | ≤ 0.5 | 16 | 0.12   | 2/4  | 1/4     | 2    | 2   | 2  | 2/4 | 8     |
| 6743 | <i>P. fragii</i>           | 3A | Neg | ≤ 0.12 | ≤ 4 | ≤ 0.5 | 16 | ≤ 0.06 | 8/4  | 1/4     | 2    | 2   | 4  | 4/4 | 2     |
| 6744 | <i>P. migulae</i>          | 3A | Neg | 0.5    | ≤ 4 | ≤ 0.5 | 64 | 0.12   | 4/4  | ≤ 0.5/4 | 0.5  | 2   | 2  | 2/4 | ≤ 0.5 |
| 6745 | <i>P. gessardii</i>        | 3A | Neg | 4      | ≤ 4 | ≤ 0.5 | 64 | ≤ 0.06 | 8/4  | 1/4     | 1    | 2   | 16 | 2/4 | 4     |
| 6746 | <i>P. lactis</i>           | 3A | Neg | 16     | ≤ 4 | ≤ 0.5 | 64 | 0.12   | 8/4  | 1/4     | 8    | 2   | 8  | 2/4 | 16    |
| 6747 | <i>P. canadensis</i>       | 3A | Neg | 8      | ≤ 4 | ≤ 0.5 | 64 | ≤ 0.06 | 4/4  | 1/4     | ≥ 16 | 2   | 4  | 4/4 | 16    |
| 6748 | <i>P. cerasi</i>           | 3A | Neg | ≤ 0.12 | ≤ 4 | ≤ 0.5 | 16 | ≤ 0.06 | 4/4  | 1/4     | 2    | 2   | 4  | 4/4 | 2     |
| 6749 | <i>P. tolaasii</i>         | 3B | Neg | 4      | ≤ 4 | ≤ 0.5 | 64 | 0.5    | 8/4  | 1/4     | 1    | 2   | 8  | 4/4 | 4     |
| 6750 | <i>P. lactis</i>           | 3A | Neg | 8      | ≤ 4 | ≤ 0.5 | 64 | ≤ 0.06 | 8/4  | 1/4     | 8    | 2   | 8  | 4/4 | 8     |
| 6751 | <i>P. lactis</i>           | 3B | Neg | 32     | ≤ 4 | ≤ 0.5 | 64 | 0.5    | 8/4  | 2/4     | ≥ 16 | 2   | 8  | 4/4 | ≥ 32  |
| 6752 | <i>P. lactis</i>           | 3B | Neg | 16     | ≤ 4 | ≤ 0.5 | 64 | 0.5    | 4/4  | 2/4     | ≥ 16 | 2   | 4  | 4/4 | 16    |
| 6753 | <i>P. canadensis</i>       | 3B | Neg | 16     | ≤ 4 | ≤ 0.5 | 64 | 0.25   | 8/4  | 1/4     | ≥ 16 | 2   | 4  | 2/4 | 8     |
| 6754 | <i>P. gessardii</i>        | 3B | Pos | 16     | ≤ 4 | ≤ 0.5 | 64 | 0.12   | 8/4  | 1/4     | 1    | 2   | 8  | 4/4 | 8     |
| 6755 | <i>P. canadensis</i>       | 3B | Neg | 32     | ≤ 4 | 1     | 64 | 1      | 16/4 | 4/4     | 2    | ≤ 1 | 8  | 8/4 | 16    |
| 6756 | <i>P. corrugata</i>        | 3B | Neg | 0.5    | ≤ 4 | ≤ 0.5 | 64 | ≤ 0.06 | 16/4 | ≤ 0.5/4 | 0.5  | 2   | 16 | 4/4 | 1     |
| 6757 | <i>P. gessardii</i>        | 3B | Neg | 4      | ≤ 4 | ≤ 0.5 | 64 | ≤ 0.06 | 8/4  | 1/4     | 0.5  | 2   | 8  | 2/4 | 4     |
| 6758 | <i>P. marginalis</i>       | 3B | Neg | 2      | ≤ 4 | ≤ 0.5 | 64 | 0.12   | 4/4  | 2/4     | ≥ 16 | 2   | 4  | 4/4 | 4     |
| 6759 | <i>P. cerasi</i>           | 3B | Neg | 2      | ≤ 4 | ≤ 0.5 | 32 | ≤ 0.06 | 4/4  | ≤ 0.5/4 | 0.5  | 2   | 4  | 4/4 | 2     |
| 6760 | <i>P. marginalis</i>       | 3A | Neg | 0.5    | ≤ 4 | ≤ 0.5 | 64 | ≤ 0.06 | 4/4  | 1/4     | 1    | 2   | 8  | 2/4 | 2     |
| 6762 | <i>P. weihenstephensis</i> | 3B | Pos | 0.25   | ≤ 4 | ≤ 0.5 | 8  | 2      | 4/4  | 2/4     | 1    | 2   | 2  | 2/4 | 1     |
| 6763 | <i>P. gessardii</i>        | 3A | Neg | 1      | ≤ 4 | ≤ 0.5 | 64 | ≤ 0.06 | 8/4  | 1/4     | 0.5  | 2   | 4  | 2/4 | 1     |

|      |                               |    |     |        |     |       |    |        |       |         |      |   |       |         |       |
|------|-------------------------------|----|-----|--------|-----|-------|----|--------|-------|---------|------|---|-------|---------|-------|
| 6765 | <i>P. weihenstephansensis</i> | 3A | Neg | ≤ 0.12 | ≤ 4 | ≤ 0.5 | 4  | ≤ 0.06 | ≤ 1/4 | 1/4     | 0.5  | 2 | 1     | 1/4     | ≤ 0.5 |
| 6766 | <i>P. canadensis</i>          | 3B | Neg | 16     | ≤ 4 | 2     | 64 | 2      | 16/4  | 8/4     | ≥ 16 | 2 | 16    | 4/4     | 16    |
| 6767 | <i>P. lactis</i>              | 3B | Neg | 8      | ≤ 4 | ≤ 0.5 | 64 | 0.25   | 4/4   | 1/4     | ≥ 16 | 2 | 2     | 2/4     | 16    |
| 6768 | <i>P. gessardii</i>           | 3A | Neg | 16     | ≤ 4 | ≤ 0.5 | 64 | ≤ 0.06 | 8/4   | 1/4     | 1    | 2 | 8     | 2/4     | 16    |
| 6769 | <i>P. deceptivonensis</i>     | 3A | Neg | ≤ 0.12 | ≤ 4 | ≤ 0.5 | 8  | 0.12   | 2/4   | ≤ 0.5/4 | 1    | 2 | 1     | 1/4     | ≤ 0.5 |
| 6770 | <i>P. veronii</i>             | 3A | Neg | 2      | ≤ 4 | ≤ 0.5 | 64 | 0.12   | 16/4  | 2/4     | 0.5  | 2 | 4     | 4/4     | 2     |
| 6771 | <i>P. lactis</i>              | 3A | Neg | 4      | ≤ 4 | ≤ 0.5 | 64 | ≤ 0.06 | 4/4   | ≤ 0.5/4 | 4    | 2 | 2     | 2/4     | 4     |
| 6772 | <i>P. gessardii</i>           | 3A | Neg | 32     | ≤ 4 | 1     | 32 | ≤ 0.06 | 8/4   | 1/4     | 1    | 2 | ≥ 32  | 2/4     | 16    |
| 6773 | <i>P. migulae</i>             | 3A | Neg | 1      | ≤ 4 | ≤ 0.5 | 64 | ≤ 0.06 | 2/4   | ≤ 0.5/4 | 0.5  | 2 | ≤ 0.5 | ≤ 0.5/4 | 1     |
| 6774 | <i>P. canadensis</i>          | 3A | Neg | 4      | ≤ 4 | ≤ 0.5 | 64 | ≤ 0.06 | 4/4   | 1/4     | ≥ 16 | 2 | 4     | 4/4     | 8     |
| 6775 | <i>P. veronii</i>             | 3A | Neg | 2      | ≤ 4 | ≤ 0.5 | 64 | ≤ 0.06 | 8/4   | 2/4     | 0.5  | 2 | 8     | 4/4     | 2     |
| 6776 | <i>P. corrugata</i>           | 3A | Pos | 32     | ≤ 4 | ≤ 0.5 | 64 | 0.25   | 32/4  | ≤ 0.5/4 | 1    | 2 | 16    | ≥ 16/4  | 4     |
| 6777 | <i>P. migulae</i>             | 3A | Neg | 0.5    | ≤ 4 | ≤ 0.5 | 64 | ≤ 0.06 | 4/4   | ≤ 0.5/4 | 0.5  | 2 | 2     | 2/4     | 1     |
| 6778 | <i>P. veronii</i>             | 3A | Neg | 2      | ≤ 4 | ≤ 0.5 | 64 | 0.12   | 8/4   | 2/4     | 0.5  | 2 | 8     | 4/4     | 2     |
| 6779 | <i>P. weihenstephansensis</i> | 3A | Neg | 0.5    | ≤ 4 | ≤ 0.5 | 64 | 1      | 2/4   | 1/4     | 0.5  | 2 | 4     | 2/4     | 1     |
| 6780 | <i>P. gessardii</i>           | 3A | Neg | 4      | ≤ 4 | ≤ 0.5 | 32 | ≤ 0.06 | 4/4   | ≤ 0.5/4 | 0.5  | 2 | 4     | 1/4     | 4     |
| 6781 | <i>P. lactis</i>              | 3A | Neg | 2      | ≤ 4 | ≤ 0.5 | 64 | ≤ 0.06 | 4/4   | 1/4     | ≥ 16 | 2 | 2     | 2/4     | 2     |
| 6782 | <i>P. weihenstephansensis</i> | 3A | Neg | ≤ 0.12 | ≤ 4 | ≤ 0.5 | 8  | 0.12   | 4/4   | 1/4     | 1    | 2 | 2     | 2/4     | 1     |
| 6783 | <i>P. weihenstephansensis</i> | 3A | Neg | ≤ 0.12 | ≤ 4 | ≤ 0.5 | 8  | 0.12   | 2/4   | 1/4     | 1    | 2 | 1     | 1/4     | ≤ 0.5 |
| 6784 | <i>P. gessardii</i>           | 3A | Neg | 32     | ≤ 4 | ≤ 0.5 | 64 | ≤ 0.06 | 8/4   | 1/4     | 1    | 2 | ≥ 32  | 2/4     | 16    |

|      |                            |    |     |        |     |       |    |        |      |         |        |   |      |     |       |
|------|----------------------------|----|-----|--------|-----|-------|----|--------|------|---------|--------|---|------|-----|-------|
| 6785 | <i>P. brennerii</i>        | 3A | Neg | 4      | ≤ 4 | ≤ 0.5 | 64 | ≤ 0.06 | 8/4  | 1/4     | 1      | 2 | 2    | 2/4 | 1     |
| 6786 | <i>P. veronii</i>          | 3A | Neg | 2      | ≤ 4 | ≤ 0.5 | 64 | ≤ 0.06 | 8/4  | 1/4     | ≤ 0.25 | 2 | 4    | 4/4 | 2     |
| 6787 | <i>P. gessardii</i>        | 3A | Neg | 32     | ≤ 4 | ≤ 0.5 | 64 | ≤ 0.06 | 16/4 | 2/4     | 1      | 2 | ≥ 32 | 4/4 | 16    |
| 6788 | <i>P. weihenstephensis</i> | 3A | Neg | ≤ 0.12 | ≤ 4 | ≤ 0.5 | 16 | ≤ 0.06 | 4/4  | 1/4     | 2      | 2 | 2    | 2/4 | 2     |
| 6789 | <i>P. lactis</i>           | 3A | Neg | 4      | ≤ 4 | ≤ 0.5 | 32 | 0.12   | 4/4  | 2/4     | 8      | 2 | 2    | 2/4 | 8     |
| 6790 | <i>P. fragi</i>            | 3A | Neg | ≤ 0.12 | ≤ 4 | ≤ 0.5 | 8  | ≤ 0.06 | 4/4  | ≤ 0.5/4 | 1      | 2 | 2    | 2/4 | ≤ 0.5 |
| 6791 | <i>P. fragi</i>            | 3A | Neg | ≤ 0.12 | ≤ 4 | ≤ 0.5 | 8  | ≤ 0.06 | 2/4  | ≤ 0.5/4 | 0.5    | 2 | 2    | 2/4 | ≤ 0.5 |
| 6792 | <i>P. fragi</i>            | 3A | Neg | ≤ 0.12 | ≤ 4 | ≤ 0.5 | 16 | ≤ 0.06 | 4/4  | 4/4     | 2      | 2 | 8    | 4/4 | ≤ 0.5 |
| 6793 | <i>P. cerasi</i>           | 3A | Neg | ≤ 0.12 | ≤ 4 | ≤ 0.5 | 8  | ≤ 0.06 | 2/4  | 1/4     | 2      | 2 | 4    | 2/4 | 2     |
| 6794 | <i>P. migulae</i>          | 3A | Neg | 1      | ≤ 4 | ≤ 0.5 | 64 | 0.12   | 2/4  | ≤ 0.5/4 | 0.5    | 2 | 1    | 1/4 | 1     |
| 6795 | <i>P. veronii</i>          | 3A | Neg | 2      | ≤ 4 | ≤ 0.5 | 64 | 0.12   | 8/4  | 2/4     | 0.5    | 2 | 8    | 4/4 | 2     |
| 6808 | <i>P. migulae</i>          | 3A | Neg | 0.5    | ≤ 4 | ≤ 0.5 | 64 | 0.12   | 4/4  | ≤ 0.5/4 | 0.5    | 2 | 1    | 2/4 | 1     |
| 7440 | <i>P. canadensis</i>       | 1  | Neg | 16     | ≤ 4 | ≤ 0.5 | 64 | 0.25   | 4/4  | 1/4     | ≥ 16   | 2 | 4    | 4/4 | 8     |
| 7441 | <i>P. lactis</i>           | 1  | Neg | 4      | ≤ 4 | ≤ 0.5 | 64 | ≤ 0.06 | 4/4  | 1/4     | ≥ 16   | 2 | 2    | 2/4 | 16    |
| 7445 | <i>P. lactis</i>           | 1  | Neg | 16     | ≤ 4 | 4     | 64 | 0.25   | 8/4  | 2/4     | ≥ 16   | 2 | 4    | 4/4 | 16    |
| 7446 | <i>P. lactis</i>           | 1  | Neg | 8      | ≤ 4 | ≤ 0.5 | 64 | 0.25   | 4/4  | 2/4     | ≥ 16   | 2 | 4    | 2/4 | 16    |
| 7447 | <i>P. marginalis</i>       | 4  | Neg | 4      | ≤ 4 | ≤ 0.5 | 64 | 0.12   | 8/4  | 2/4     | 4      | 2 | ≥ 32 | 4/4 | 8     |
| 7448 | <i>P. gessardii</i>        | 4  | Neg | 16     | ≤ 4 | ≤ 0.5 | 64 | ≤ 0.06 | 8/4  | 2/4     | 1      | 2 | 16   | 4/4 | 16    |
| 7450 | <i>P. lactis</i>           | 4  | Neg | 16     | ≤ 4 | ≤ 0.5 | 64 | 0.12   | 8/4  | 1/4     | 0.5    | 2 | 4    | 4/4 | ≥ 32  |
| 7451 | <i>P. lactis</i>           | 4  | Neg | 16     | ≤ 4 | ≤ 0.5 | 64 | 0.25   | 4/4  | 2/4     | ≥ 16   | 2 | 4    | 4/4 | 16    |
| 7452 | <i>P. lactis</i>           | 4  | Neg | 16     | ≤ 4 | 1     | 64 | 0.5    | 4/4  | 2/4     | 2      | 2 | 4    | 2/4 | 16    |
| 7453 | <i>P. lactis</i>           | 4  | Neg | 8      | ≤ 4 | ≤ 0.5 | 64 | 0.25   | 4/4  | 2/4     | 4      | 2 | 8    | 4/4 | 16    |
| 7454 | <i>P. lactis</i>           | 4  | Neg | 8      | ≤ 4 | ≤ 0.5 | 64 | 0.12   | 8/4  | 2/4     | ≥ 16   | 2 | 2    | 2/4 | 16    |
| 7478 | <i>P. migulae</i>          | 1  | Neg | 1      | ≤ 4 | ≤ 0.5 | 64 | 0.12   | 4/4  | ≤ 0.5/4 | 0.5    | 2 | 2    | 2/4 | 1     |
| 7479 | <i>P. weihenstephensis</i> | 1  | Neg | 0.25   | ≤ 4 | ≤ 0.5 | 16 | ≤ 0.06 | 4/4  | 1/4     | 1      | 2 | 2    | 1/4 | 1     |
| 7480 | <i>P. marginalis</i>       | 4  | Neg | 0.5    | ≤ 4 | ≤ 0.5 | 64 | ≤ 0.06 | 8/4  | 1/4     | 1      | 2 | 4    | 1/4 | 1     |
| 7480 | <i>P. marginalis</i>       | 1  | Neg | 2      | ≤ 4 | ≤ 0.5 | 64 | ≤ 0.06 | 4/4  | 1/4     | ≥ 16   | 2 | 2    | 2/4 | 4     |

|      |                              |   |     |        |     |       |    |        |      |         |      |   |      |     |       |
|------|------------------------------|---|-----|--------|-----|-------|----|--------|------|---------|------|---|------|-----|-------|
| 7482 | <i>P. helleri</i>            | 1 | Neg | ≤ 0.12 | ≤ 4 | ≤ 0.5 | 16 | 0.12   | 4/4  | 2/4     | 8    | 2 | 4    | 2/4 | ≤ 0.5 |
| 7483 | <i>P. tolaasii</i>           | 1 | Neg | 4      | ≤ 4 | ≤ 0.5 | 64 | ≤ 0.06 | 8/4  | 1/4     | 1    | 2 | 8    | 4/4 | 4     |
| 7485 | <i>P. weihenstephanensis</i> | 1 | Neg | 0.5    | ≤ 4 | ≤ 0.5 | 16 | 0.12   | 4/4  | 2/4     | 1    | 2 | 2    | 2/4 | 1     |
| 7486 | <i>P. weihenstephanensis</i> | 1 | Neg | ≤ 0.12 | ≤ 4 | ≤ 0.5 | 16 | 0.12   | 4/4  | 2/4     | 1    | 2 | 4    | 4/4 | 1     |
| 7490 | <i>P. canadensis</i>         | 1 | Neg | 4      | ≤ 4 | ≤ 0.5 | 64 | 0.25   | 8/4  | 1/4     | ≥ 16 | 2 | 8    | 4/4 | 8     |
| 7492 | <i>P. helmancticensis</i>    | 1 | Neg | 1      | ≤ 4 | ≤ 0.5 | 64 | 0.12   | 16/4 | 1/4     | 1    | 2 | 4    | 4/4 | ≤ 0.5 |
| 7493 | <i>P. koreensis</i>          | 1 | Neg | 0.25   | ≤ 4 | ≤ 0.5 | 64 | 0.12   | 8/4  | 1/4     | 0.5  | 2 | ≥ 32 | 4/4 | 2     |
| 7495 | <i>P. veronii</i>            | 1 | Neg | 2      | ≤ 4 | ≤ 0.5 | 64 | 0.12   | 8/4  | 1/4     | 0.5  | 2 | 4    | 2/4 | 2     |
| 7496 | <i>P. corrugata</i>          | 1 | Neg | 0.5    | ≤ 4 | ≤ 0.5 | 64 | ≤ 0.06 | 16/4 | ≤ 0.5/4 | 0.5  | 2 | 4    | 4/4 | 1     |
| 7497 | <i>P. weihenstephanensis</i> | 1 | Neg | 0.5    | ≤ 4 | ≤ 0.5 | 16 | 0.25   | 4/4  | 4/4     | 1    | 2 | 4    | 4/4 | ≤ 0.5 |
| 7498 | <i>P. tolaasii</i>           | 1 | Neg | 4      | ≤ 4 | ≤ 0.5 | 64 | ≤ 0.06 | 8/4  | 1/4     | 1    | 2 | 4    | 4/4 | 4     |
| 7501 | <i>P. migulae</i>            | 1 | Neg | 0.5    | ≤ 4 | ≤ 0.5 | 64 | 0.12   | 8/4  | ≤ 0.5/4 | 1    | 2 | 2    | 2/4 | 1     |
| 7503 | <i>P. turukhanskensis</i>    | 1 | Neg | 0.5    | ≤ 4 | ≤ 0.5 | 64 | ≤ 0.06 | 8/4  | 1/4     | 0.5  | 2 | ≥ 32 | 4/4 | 1     |
| 7507 | <i>P. silesiensis</i>        | 4 | Neg | ≤ 0.12 | ≤ 4 | ≤ 0.5 | 64 | ≤ 0.06 | 4/4  | ≤ 0.5/4 | 1    | 2 | 4    | 2/4 | 1     |
| 7508 | <i>P. weihenstephanensis</i> | 1 | Neg | 0.5    | ≤ 4 | ≤ 0.5 | 16 | ≤ 0.06 | 4/4  | 4/4     | 1    | 2 | 4    | 2/4 | ≤ 0.5 |
| 7509 | <i>P. cerasi</i>             | 1 | Neg | ≤ 0.12 | ≤ 4 | ≤ 0.5 | 8  | ≤ 0.06 | 4/4  | 1/4     | 4    | 2 | 2    | 4/4 | 2     |
| 7510 | <i>P. gessardii</i>          | 4 | Neg | 8      | ≤ 4 | ≤ 0.5 | 64 | ≤ 0.06 | 8/4  | 1/4     | 1    | 2 | 8    | 2/4 | 2     |
| 7512 | <i>P. weihenstephanensis</i> | 1 | Neg | 1      | ≤ 4 | ≤ 0.5 | 16 | 0.12   | 4/4  | 4/4     | 1    | 2 | 4    | 4/4 | 2     |
| 7514 | <i>P. cerasi</i>             | 1 | Neg | 0.25   | ≤ 4 | ≤ 0.5 | 16 | ≤ 0.06 | 4/4  | 1/4     | 1    | 2 | 4    | 4/4 | 2     |

|      |                              |   |     |        |     |       |    |        |      |         |      |   |   |     |       |
|------|------------------------------|---|-----|--------|-----|-------|----|--------|------|---------|------|---|---|-----|-------|
| 7515 | <i>P. weihenstephanensis</i> | 1 | Neg | 0.25   | ≤ 4 | ≤ 0.5 | 32 | 0.5    | 8/4  | 4/4     | 1    | 2 | 8 | 8/4 | 1     |
| 7516 | <i>P. gessardii</i>          | 1 | Neg | 4      | ≤ 4 | ≤ 0.5 | 64 | ≤ 0.06 | 4/4  | 1/4     | 1    | 2 | 4 | 2/4 | 4     |
| 7517 | <i>P. koreensis</i>          | 1 | Neg | 1      | 8   | ≤ 0.5 | 64 | ≤ 0.06 | 16/4 | 1/4     | 2    | 2 | 8 | 8/4 | 2     |
| 7518 | <i>P. weihenstephanensis</i> | 1 | Neg | ≤ 0.12 | ≤ 4 | ≤ 0.5 | 8  | ≤ 0.06 | 2/4  | 1/4     | 1    | 2 | 2 | 1/4 | 1     |
| 7519 | <i>P. koreensis</i>          | 1 | Neg | 0.25   | ≤ 4 | ≤ 0.5 | 32 | 0.12   | 8/4  | 1/4     | 1    | 2 | 8 | 4/4 | 2     |
| 7520 | <i>P. marginalis</i>         | 1 | Neg | 4      | ≤ 4 | ≤ 0.5 | 64 | 0.25   | 8/4  | 1/4     | ≥ 16 | 2 | 4 | 4/4 | 4     |
| 7521 | <i>P. canadensis</i>         | 1 | Neg | 4      | ≤ 4 | ≤ 0.5 | 64 | 0.25   | 8/4  | 1/4     | ≥ 16 | 2 | 4 | 4/4 | 8     |
| 7524 | <i>P. marginalis</i>         | 1 | Neg | 4      | ≤ 4 | ≤ 0.5 | 64 | 0.25   | 8/4  | 2/4     | ≥ 16 | 2 | 8 | 8/4 | 4     |
| 7525 | <i>P. lactis</i>             | 4 | Neg | 4      | ≤ 4 | ≤ 0.5 | 64 | 0.12   | 4/4  | 1/4     | 4    | 2 | 2 | 2/4 | 8     |
| 7528 | <i>P. weihenstephanensis</i> | 1 | Neg | ≤ 0.12 | ≤ 4 | ≤ 0.5 | 16 | 0.12   | 4/4  | 4/4     | 4    | 2 | 4 | 4/4 | ≤ 0.5 |
| 7529 | <i>P. cerasi</i>             | 1 | Neg | ≤ 0.12 | ≤ 4 | ≤ 0.5 | 8  | ≤ 0.06 | 4/4  | ≤ 0.5/4 | 2    | 2 | 2 | 2/4 | 0.5   |
| 7531 | <i>P. silesiensis</i>        | 4 | Neg | ≤ 0.12 | ≤ 4 | ≤ 0.5 | 64 | ≤ 0.06 | 2/4  | ≤ 0.5/4 | 1    | 2 | 2 | 2/4 | 1     |
| 7531 | <i>P. weihenstephanensis</i> | 1 | Neg | ≤ 0.12 | ≤ 4 | ≤ 0.5 | 8  | ≤ 0.06 | 2/4  | 1/4     | 2    | 2 | 1 | 1/4 | ≤ 0.5 |
| 7532 | <i>P. flavescens</i>         | 4 | Neg | 1      | ≤ 4 | ≤ 0.5 | 16 | ≤ 0.06 | 8/4  | ≤ 0.5/4 | 1    | 2 | 2 | 2/4 | ≤ 0.5 |
| 7532 | <i>P. fragi</i>              | 1 | Neg | ≤ 0.12 | ≤ 4 | ≤ 0.5 | 16 | ≤ 0.06 | 2/4  | 1/4     | 1    | 2 | 4 | 4/4 | ≤ 0.5 |
| 7536 | <i>P. flavescens</i>         | 4 | Neg | 2      | ≤ 4 | ≤ 0.5 | 16 | ≤ 0.06 | 8/4  | ≤ 0.5/4 | 1    | 2 | 2 | 2/4 | ≤ 0.5 |
| 7539 | <i>P. cerasi</i>             | 1 | Neg | ≤ 0.12 | ≤ 4 | ≤ 0.5 | 8  | ≤ 0.06 | 2/4  | 1/4     | 4    | 2 | 2 | 2/4 | 2     |
| 7540 | <i>P. gessardii</i>          | 1 | Neg | 8      | ≤ 4 | ≤ 0.5 | 32 | ≤ 0.06 | 4/4  | 1/4     | 1    | 2 | 4 | 2/4 | 8     |
| 7541 | <i>P. marginalis</i>         | 4 | Neg | 4      | ≤ 4 | ≤ 0.5 | 64 | 0.12   | 4/4  | ≤ 0.5/4 | 8    | 2 | 2 | 2/4 | 4     |
| 7541 | <i>P. helleri</i>            | 1 | Neg | ≤ 0.12 | ≤ 4 | ≤ 0.5 | 8  | ≤ 0.06 | 4/4  | 2/4     | 2    | 2 | 2 | 2/4 | ≤ 0.5 |

|      |                              |   |     |        |     |       |    |        |     |         |      |   |    |     |       |
|------|------------------------------|---|-----|--------|-----|-------|----|--------|-----|---------|------|---|----|-----|-------|
| 7543 | <i>P. weihenstephanensis</i> | 1 | Neg | ≤ 0.12 | ≤ 4 | ≤ 0.5 | 8  | 0.12   | 4/4 | 2/4     | 1    | 2 | 2  | 2/4 | 2     |
| 7544 | <i>P. rhodesiae</i>          | 1 | Neg | 1      | ≤ 4 | ≤ 0.5 | 64 | ≤ 0.06 | 4/4 | 1/4     | 1    | 2 | 2  | 2/4 | 4     |
| 7548 | <i>P. fragi</i>              | 1 | Neg | 0.12   | ≤ 4 | ≤ 0.5 | 16 | 0.06   | 4/4 | 2/4     | 8    | 2 | 4  | 4/4 | 2     |
| 7549 | <i>P. weihenstephanensis</i> | 1 | Neg | 0.25   | ≤ 4 | ≤ 0.5 | 16 | 0.12   | 4/4 | 2/4     | 1    | 2 | 2  | 2/4 | 1     |
| 7550 | <i>P. weihenstephanensis</i> | 1 | Neg | ≤ 0.12 | ≤ 4 | ≤ 0.5 | 8  | 0.12   | 2/4 | 1/4     | 1    | 2 | 2  | 1/4 | ≤ 0.5 |
| 7551 | <i>P. weihenstephanensis</i> | 1 | Neg | 0.5    | ≤ 4 | ≤ 0.5 | 8  | 0.12   | 4/4 | 2/4     | 2    | 2 | 1  | 1/4 | 1     |
| 7554 | <i>P. helleri</i>            | 1 | Neg | 0.5    | ≤ 4 | ≤ 0.5 | 8  | ≤ 0.06 | 4/4 | 2/4     | 4    | 2 | 4  | 4/4 | ≤ 0.5 |
| 7556 | <i>P. gessardii</i>          | 1 | Neg | 8      | ≤ 4 | ≤ 0.5 | 64 | ≤ 0.06 | 8/4 | 1/4     | 0.5  | 2 | 4  | 2/4 | 2     |
| 7557 | <i>P. gessardii</i>          | 4 | Neg | 8      | ≤ 4 | ≤ 0.5 | 64 | ≤ 0.06 | 8/4 | 1/4     | 1    | 2 | 16 | 2/4 | 4     |
| 7558 | <i>P. helleri</i>            | 1 | Neg | 0.25   | ≤ 4 | ≤ 0.5 | 16 | 0.12   | 4/4 | 4/4     | 4    | 2 | 8  | 4/4 | ≤ 0.5 |
| 7561 | <i>P. corrugata</i>          | 4 | Neg | 0.5    | ≤ 4 | ≤ 0.5 | 32 | ≤ 0.06 | 8/4 | ≤ 0.5/4 | 0.5  | 2 | 4  | 2/4 | ≤ 0.5 |
| 7562 | <i>P. gessardii</i>          | 4 | Neg | 8      | ≤ 4 | ≤ 0.5 | 64 | 0.12   | 8/4 | 1/4     | 0.5  | 2 | 8  | 4/4 | 2     |
| 7563 | <i>P. koreensis</i>          | 4 | Neg | 1      | ≤ 4 | ≤ 0.5 | 32 | ≤ 0.06 | 4/4 | 1/4     | 0.5  | 2 | 8  | 4/4 | 2     |
| 7565 | <i>P. gessardii</i>          | 4 | Neg | 2      | ≤ 4 | ≤ 0.5 | 32 | ≤ 0.06 | 4/4 | 1/4     | 0.5  | 2 | 4  | 2/4 | 1     |
| 7566 | <i>P. silesiensis</i>        | 4 | Neg | 0.25   | ≤ 4 | ≤ 0.5 | 64 | ≤ 0.06 | 4/4 | 1/4     | 1    | 2 | 4  | 4/4 | 1     |
| 7567 | <i>P. lactis</i>             | 4 | Neg | 4      | ≤ 4 | ≤ 0.5 | 64 | ≤ 0.06 | 4/4 | 1/4     | ≥ 16 | 2 | 2  | 2/4 | 4     |
| 7569 | <i>P. gessardii</i>          | 4 | Neg | 4      | ≤ 4 | ≤ 0.5 | 64 | 0.12   | 8/4 | 1/4     | 4    | 2 | 4  | 4/4 | 2     |
| 7570 | <i>P. turukhanskensis</i>    | 4 | Neg | 0.25   | ≤ 4 | ≤ 0.5 | 32 | ≤ 0.06 | 4/4 | ≤ 0.5/4 | 0.5  | 2 | 8  | 2/4 | ≤ 0.5 |
| 7571 | <i>P. brassicaearum</i>      | 4 | Neg | ≤ 0.12 | ≤ 4 | ≤ 0.5 | 32 | 0.12   | 4/4 | 1/4     | 0.5  | 2 | 16 | 2/4 | ≤ 0.5 |



|      |                           |   |     |   |     |       |    |        |      |         |      |   |      |     |       |
|------|---------------------------|---|-----|---|-----|-------|----|--------|------|---------|------|---|------|-----|-------|
| 7572 | <i>P. helmaniticensis</i> | 4 | Neg | 1 | ≤ 4 | ≤ 0.5 | 32 | ≤ 0.06 | 16/4 | ≤ 0.5/4 | 0.5  | 2 | 4    | 4/4 | 1     |
| 7573 | <i>P. corrugata</i>       | 4 | Neg | 4 | ≤ 4 | ≤ 0.5 | 64 | 0.12   | 8/4  | ≤ 0.5/4 | 0.5  | 2 | 4    | 4/4 | ≤ 0.5 |
| 7574 | <i>P. gessardii</i>       | 4 | Neg | 8 | ≤ 4 | ≤ 0.5 | 32 | ≤ 0.06 | 4/4  | ≤ 0.5/4 | 1    | 2 | 8    | 2/4 | 4     |
| 7575 | <i>P. canadensis</i>      | 4 | Neg | 2 | ≤ 4 | ≤ 0.5 | 64 | 0.12   | 8/4  | 1/4     | 1    | 2 | 8    | 2/4 | 8     |
| 7576 | <i>P. lactis</i>          | 4 | Neg | 4 | ≤ 4 | ≤ 0.5 | 64 | 0.12   | 4/4  | 1/4     | ≥ 16 | 2 | 2    | 2/4 | 8     |
| 7577 | <i>P. lactis</i>          | 4 | Neg | 8 | ≤ 4 | ≤ 0.5 | 64 | ≤ 0.06 | 4/4  | 1/4     | ≥ 16 | 2 | 2    | 2/4 | 8     |
| 7578 | <i>P. turukhanskensis</i> | 4 | Neg | 2 | ≤ 4 | ≤ 0.5 | 64 | ≤ 0.06 | 16/4 | 1/4     | 1    | 2 | ≥ 32 | 4/4 | 1     |
| 7579 | <i>P. migulae</i>         | 4 | Neg | 1 | ≤ 4 | ≤ 0.5 | 64 | 0.12   | 4/4  | ≤ 0.5/4 | 0.5  | 2 | 2    | 2/4 | ≤ 0.5 |
| 7580 | <i>P. marginalis</i>      | 4 | Neg | 4 | ≤ 4 | ≤ 0.5 | 64 | ≤ 0.06 | 16/4 | 4/4     | 1    | 2 | ≥ 32 | 4/4 | 1     |
| 7582 | <i>P. corrugata</i>       | 4 | Neg | 2 | ≤ 4 | 2     | 32 | 0.25   | 16/4 | 1/4     | 1    | 2 | 16   | 8/4 | 2     |
| 7584 | <i>P. gessardii</i>       | 4 | Neg | 8 | ≤ 4 | ≤ 0.5 | 64 | 0.12   | 16/4 | 1/4     | 0.5  | 2 | 8    | 4/4 | 4     |
| 7585 | <i>P. lactis</i>          | 4 | Neg | 4 | ≤ 4 | ≤ 0.5 | 64 | 0.12   | 4/4  | 1/4     | ≥ 16 | 2 | 4    | 2/4 | 8     |
| 7601 | <i>P. gessardii</i>       | 4 | Neg | 8 | ≤ 4 | ≤ 0.5 | 64 | ≤ 0.06 | 8/4  | 1/4     | 0.5  | 2 | 4    | 2/4 | 4     |

**Table S6.** Taxonomic profiling based on ribosomal Multilocus Sequence Typing (rMLST). The isolate name, corresponding best match in the rMLST database and percentage support as well as best BLAST match according to partial 16S rRNA gene are show. For three isolates no species were given in rMLST, only 100% match to *Pseudomonas*.

| Isolate | Best match                                | % support | BLAST 16S best match         |
|---------|-------------------------------------------|-----------|------------------------------|
| MF6776  | <i>P. baetica</i>                         | 20        | <i>P. corrugata</i>          |
| MF5691  | <i>P. brenneri</i>                        | 97        | <i>P. gessardii</i>          |
| MF6768  | <i>P. brenneri</i>                        | 96        | <i>P. gessardii</i>          |
| MF6772  | <i>P. brenneri</i>                        | 98        | <i>P. gessardii</i>          |
| MF6784  | <i>P. brenneri</i>                        | 98        | <i>P. gessardii</i>          |
| MF6787  | <i>P. brenneri</i>                        | 98        | <i>P. gessardii</i>          |
| MF6754  | <i>P. brenneri/P. proteolytica</i>        | 86/11     | <i>P. gessardii</i>          |
| MF7448  | <i>P. brenneri/P. proteolytica</i>        | 89/6      | <i>P. gessardii</i>          |
| MF7446  | <i>P. carnis</i>                          | 100       | <i>P. lactis</i>             |
| MF7454  | <i>P. carnis</i>                          | 100       | <i>P. lactis</i>             |
| MF6751  | <i>P. carnis/P. fluorescens</i>           | 50/50     | <i>P. lactis</i>             |
| MF2830  | <i>P. fluorescens</i>                     | 100       | <i>P. lactis</i>             |
| MF6746  | <i>P. fluorescens</i>                     | 100       | <i>P. lactis</i>             |
| MF6752  | <i>P. fluorescens</i>                     | 100       | <i>P. lactis</i>             |
| MF7441  | <i>P. fluorescens</i>                     | 100       | <i>P. lactis</i>             |
| MF7450  | <i>P. fluorescens</i>                     | 100       | <i>P. lactis</i>             |
| MF7451  | <i>P. fluorescens</i>                     | 98        | <i>P. lactis</i>             |
| MF7452  | <i>P. fluorescens</i>                     | 100       | <i>P. lactis</i>             |
| MF5694  | <i>P. haemolytica</i>                     | 100       | <i>P. canadensis</i>         |
| MF6753  | <i>P. haemolytica</i>                     | 100       | <i>P. canadensis</i>         |
| MF6766  | <i>P. haemolytica</i>                     | 100       | <i>P. canadensis</i>         |
| MF7440  | <i>P. haemolytica</i>                     | 100       | <i>P. canadensis</i>         |
| MF6755  | <i>P. haemolytica/P. veronii</i>          | 88/4      | <i>P. canadensis</i>         |
| MF7445  | <i>P. lactis</i>                          | 100       | <i>P. lactis</i>             |
| MF7453  | <i>P. paralactis/P. poae/P. synxantha</i> | 87/5/5    | <i>P. lactis</i>             |
| MF6762  | <i>P. psychrophila</i>                    | 100       | <i>P. weihenstephanensis</i> |
| MF7447  | <i>P. simiae</i>                          | 100       | <i>P. marginalis</i>         |
| MF6747  | <i>P. veronii</i> *                       | 25        | <i>P. canadensis</i>         |
| MF2846  | <i>Pseudomonas</i>                        | 100       | <i>P. lactis</i>             |
| MF2857  | <i>Pseudomonas</i>                        | 100       | <i>P. lactis</i>             |
| MF6767  | <i>Pseudomonas</i>                        | 100       | <i>P. lactis</i>             |

\* 12 % to *P. antarctica*, *P. costantinii*, *P. fluorescens*, *P. orientalis*, *P. reactans* and *P. tolaasii*
